# Supplementary material for: The Symbiotic Bacteria—Xenorhabdus nematophila All and Photorhabdus luminescens H06 Strongly Affected the Phenoloxidase Activation of Nipa Palm Hispid, Octodonta nipae (Coleoptera: Chrysomelidae) Larvae
Source: MDPI journal article supplement (doi:10.3390/pathogens12040506), 2023-03-23
Supplement: s1 [file s1]

**Table S1. Recognition gene and ProPhenoloxidase activation genes primers**

| <b>Gene Name</b> | <b>Forward Primer (5'→3')</b> | <b>Reverse Primer (5'→3')</b> |
|------------------|-------------------------------|-------------------------------|
| <b>qCTL</b>      | TGGACTAAACCCCGGTCTTC          | ACAGGGCTAGGGAAAACCTCC         |
| <b>qSPP56</b>    | CGGTTGGTGGAAAGTGTCAG          | CCCTCGTTGTCCAGCTTCTA          |
| <b>qSPI28</b>    | TCGCCTTAGTGATAGCGTGT          | ACAGGGCTAGGGAAAACCTCC         |
| <b>qPPAF1</b>    | GATCACCGGCGACAAAGAAA          | CAGCTTGTTGGGATTGCCTT          |
| <b>qPPO</b>      | GTATCTTGTCACCCAATAGAGC        | AAACGATTCAAGATGCCTGT          |
| <b>q-RPS3-F</b>  | GACGGTGTCTTCAAAGCTGA          | ATTTCTGTACGTGTCGGGGT          |
